# Supplementary material for: The architecture of responsive polymeric ligands on protein binding and recovery
Source: Royal Society of Chemistry journal article supplement (doi:10.1039/c7ra01499f), 2017-01-01
Supplement: c7ra01499f1.pdf [file c7ra01499f1.pdf]

Supplementary Information

**The Architecture of Responsive Polymeric Ligands on Protein Binding and Recovery**

Zizhao Liu<sup>1</sup>, S. Ranil Wickramasinghe<sup>1</sup>, Xianghong Qian<sup>2\*</sup>

<sup>1</sup>Department of Chemical Engineering, University of Arkansas, Fayetteville, AR 72701

<sup>2</sup>Department of Biomedical Engineering, University of Arkansas, Fayetteville, AR 72701

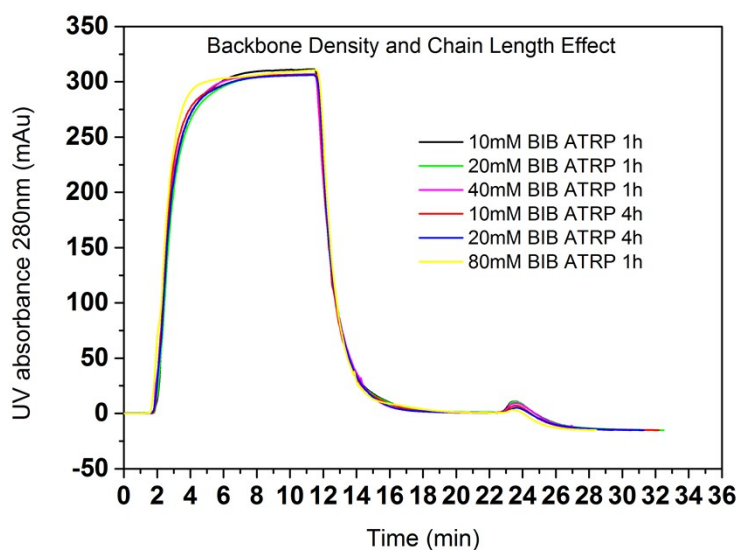

**Figure S1.** Chromatogram of membranes modified under different backbone density (indicated by concentration of BIB) and chain length conditions (indicated by poly (HEMA) ATRP time). System dead volume is 1.7 mL.

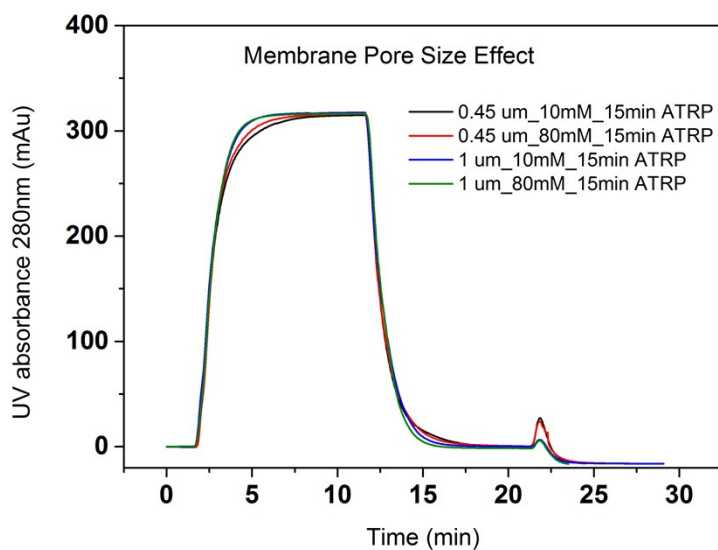

**Figure S2.** Chromatogram of membranes with different pore sizes and modified under two different initiator (1<sup>st</sup>) concentrations (10 mM and 80 mM). The ATRP time for poly (HEMA) and PVCL was kept the same as 15 min and 4 hr respectively. System dead volume is 1.7 mL.

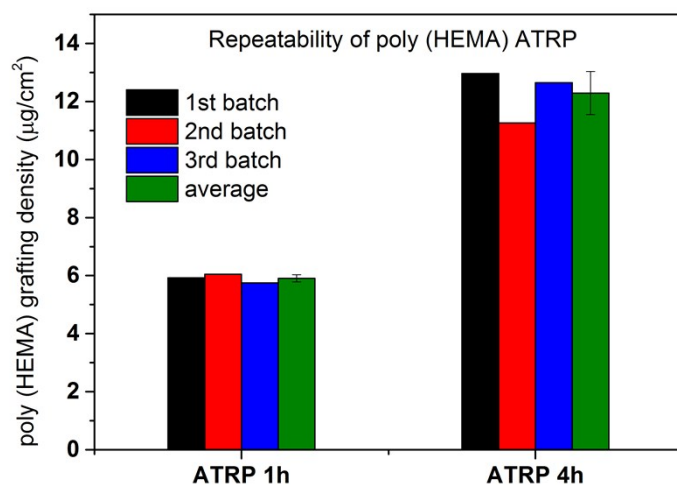

**Figure S3.** Repeatability of poly (HEMA) ATRP under condition of 40 mM BIB initiator and ATRP 1h and 4h.
